# Supplementary material for: Stable energy density of a PMN–PST ceramic from room temperature to its Curie point based on the synergistic effect of diversified energy
Source: Royal Society of Chemistry journal article supplement (doi:10.1039/c9tc02172h), 2019-01-01
Supplement: c9tc02172h1.pdf [file c9tc02172h1.pdf]

## Supporting Information

### Stable energy density of PMN-PST ceramic from room temperature to Curie point based on synergistic effect of diversified energy

Yong Li,<sup>abc</sup> Ningning Sun,<sup>abc</sup> Jinhua Du,<sup>ab</sup> Xiaowei Li,<sup>ab</sup> and Xihong Hao<sup>\*ab</sup>

<sup>a</sup> Key Laboratory of Integrated Exploitation of Bayan Obo Multi-Metal Resources, Inner Mongolia University of Science and Technology, Baotou 014010, China

<sup>b</sup> Inner Mongolia Key Laboratory of Ferroelectric-related New Energy Materials and Devices, Inner Mongolia University of Science and Technology, Baotou 014010, China

<sup>c</sup> School of Materials and Metallurgy, Inner Mongolia University of Science and Technology, Baotou 014010, China.

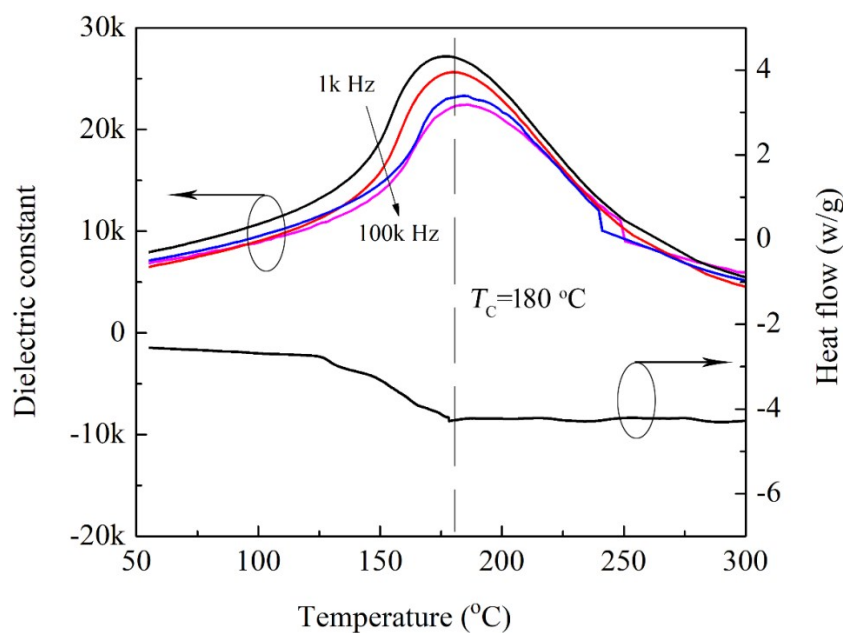

**Fig. S1** The temperature dependence and the thermal characteristic of the PMN-PST ceramic.

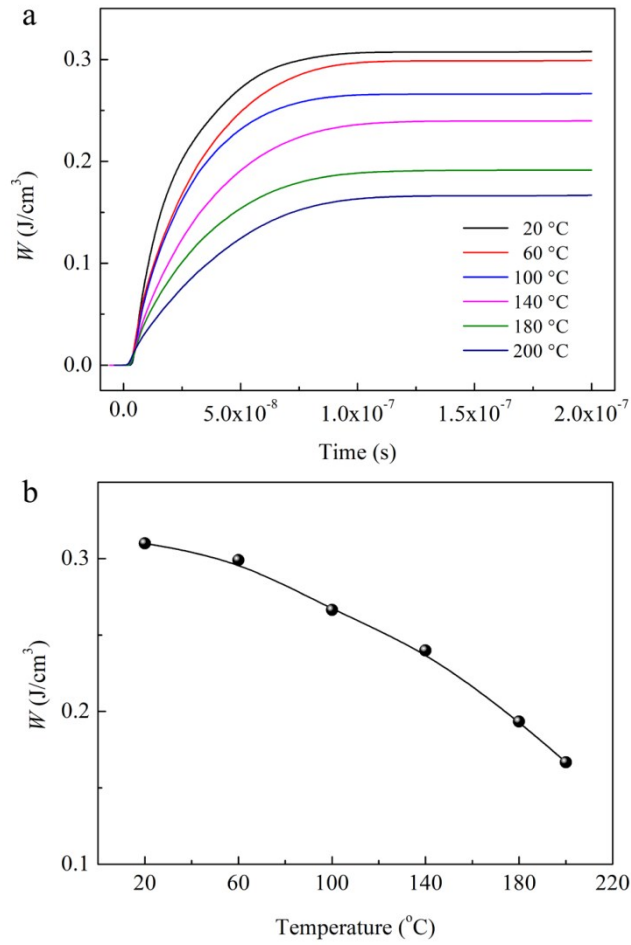

**Fig. S2** The temperature dependence of the energy density for the PMN-PST<sub>F</sub> ceramic.

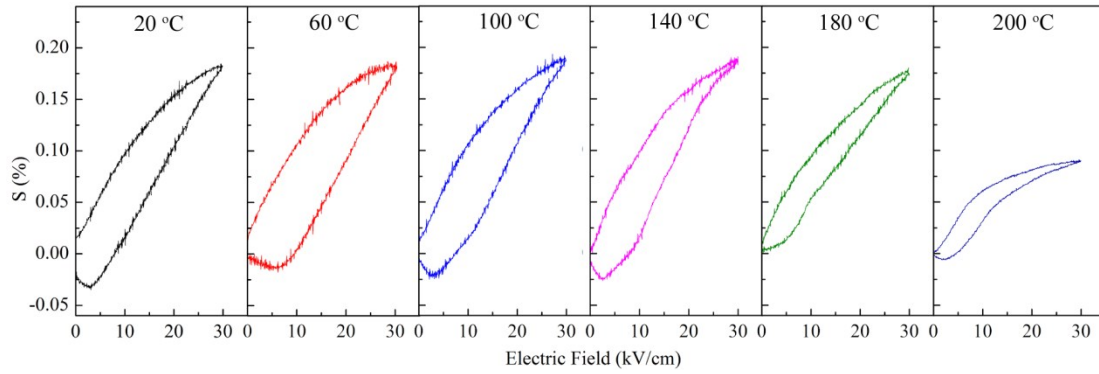

**Fig. S3** The strain properties of the PMN-PST ceramic at different temperature.

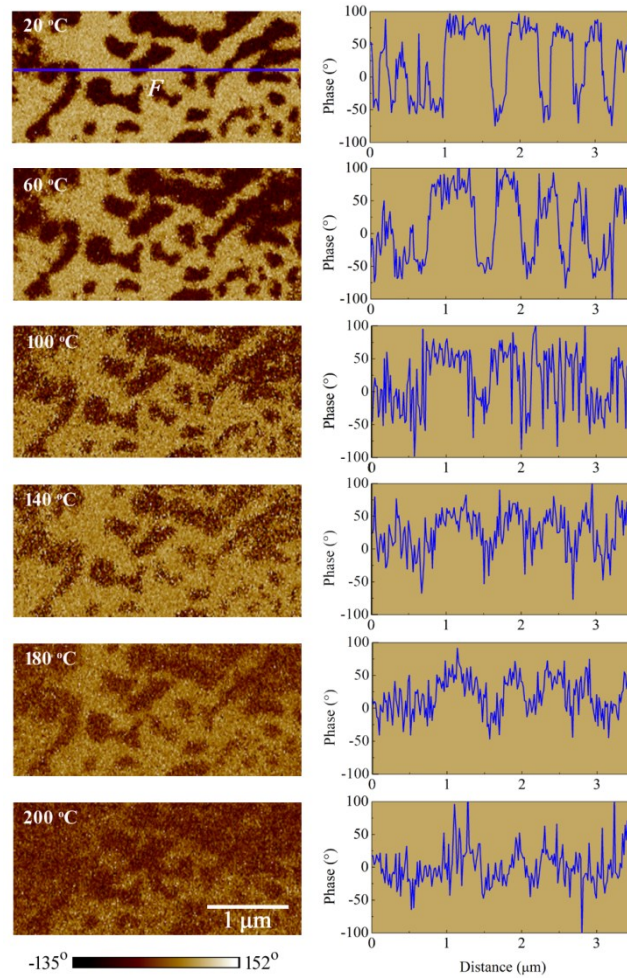

**Fig. S4** The evolution of ferroelectric domain and the phase curves corresponding to the blue line in the PMN-PST<sub>F</sub> ceramic.

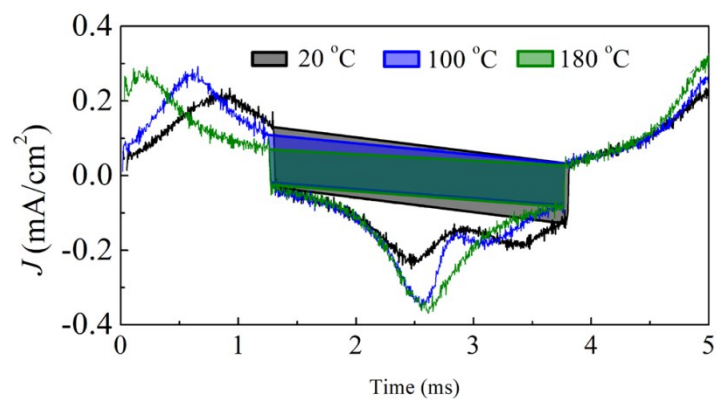

**Fig. S5** A comparison of the areas based on the  $J$ - $t$  curves at 20 °C, 100 °C and 180 °C in the PMN-PST ceramic.

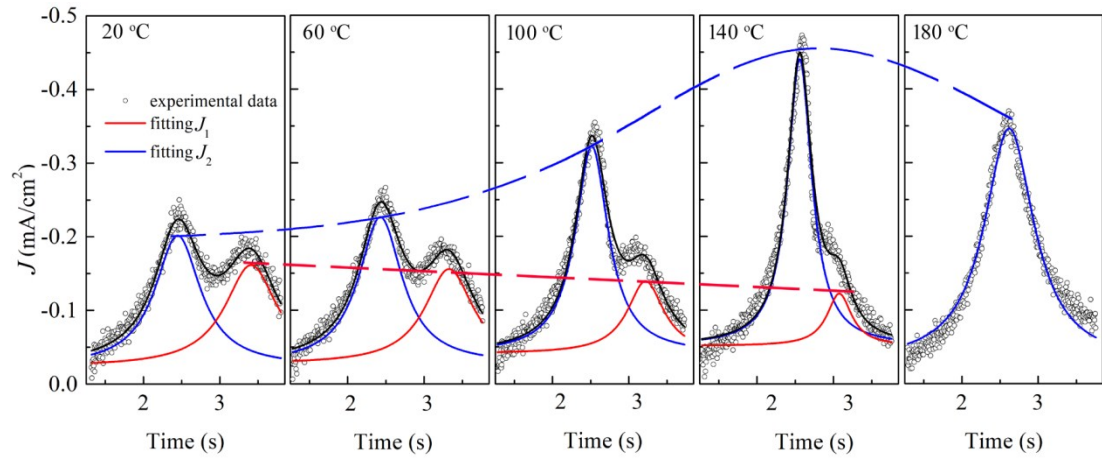

**Fig. S6** The fitting  $J_1$  and  $J_2$  based on the  $J$ - $t$  curves in the PMN-PST ceramic.
